# Supplementary material
Source: PubMed Central journal article supplement (PMC4149627)
Supplement: qai-67-15-s001.pdf [file qai-67-15-s001.pdf]

**Table S1:** Baseline Characteristics for individuals with nadir and nadir confirmed CD4 measured within 1 year and 6 months of seroconversion in the pre cART era using the CASCADE dataset

|                                                | Excluded individuals seroconverting in the pre cART era | Nadir CD4 within 6 months of SC | Nadir confirmed CD4 within 6 months of SC | Nadir confirmed CD4 within 1 year of SC |
|------------------------------------------------|---------------------------------------------------------|---------------------------------|-------------------------------------------|-----------------------------------------|
| N                                              | 6084                                                    | 2825                            | 894                                       | 2641                                    |
| Time from SC to nadir CD4 Median (IQR), months | -                                                       | 3.7 (2.3, 4.9)                  | 3.1 (1.6, 4.5)                            | 6.3 (3.7, 9.0)                          |
| Time from SC to first CD4 Median (IQR) months  | -                                                       | 4.5 (1.8, 4.5)                  | 1.8 (0.8, 3.0)                            | 3.8 (2.0, 5.8)                          |
| Number of CD4 counts Median (IQR)              | -                                                       | 1 (1, 2)                        | 2 (2, 4)                                  | 2 (2, 4)                                |
| Risk Category                                  |                                                         |                                 |                                           |                                         |
| MSM                                            | 2612 (43%)                                              | 1516 (54%)                      | 578 (65%)                                 | 1575 (60%)                              |
| MSW                                            | 1246 (20%)                                              | 588 (21%)                       | 169 (19%)                                 | 534 (20%)                               |
| IDU                                            | 1741 (29%)                                              | 599 (21%)                       | 119 (13%)                                 | 436 (17%)                               |
| Other/unknown                                  | 488 (8%)                                                | 122 (4%)                        | 28 (3%)                                   | 96 (4%)                                 |
| Sex                                            |                                                         |                                 |                                           |                                         |
| Males                                          | 4638 (76%)                                              | 2206 (78%)                      | 740 (83%)                                 | 2118 (80%)                              |
| Females                                        | 1446 (23%)                                              | 619 (22%)                       | 154 (17%)                                 | 523 (20%)                               |
| SC year Median (IQR), years                    | 1991 (1988, 1994)                                       | 1992 (1989, 1994)               | 1993 (1989, 1995)                         | 1992 (1989, 1994)                       |
| SC Age Median (IQR), years                     | 28 (24, 33)                                             | 29 (25, 35)                     | 30 (25, 37)                               | 30 (25, 36)                             |
| <20 N (%)                                      | 454 (7%)                                                | 133 (5%)                        | 34 (4%)                                   | 105 (4%)                                |
| ≥20-30 N (%)                                   | 3377 (56%)                                              | 1408 (50%)                      | 392 (44%)                                 | 1269 (48%)                              |
| ≥30-40 N (%)                                   | 1613 (27%)                                              | 861 (30%)                       | 305 (34%)                                 | 848 (32%)                               |
| ≥40 N (%)                                      | 640 (11%)                                               | 423 (15%)                       | 163 (18%)                                 | 419 (16%)                               |

Abbreviations: SC – seroconversion, IQR – interquartile range; MSM – sex between men; MSW – heterosexual contact; IDU – injection drug users

**Table S2:** Minimum and minimum confirmed CD4 percentiles within 6 months and 1 year of seroconversion in the pre cART era using the CASCADE dataset

|      | Minimum CD4 within<br>6 months of SC | Minimum confirmed CD4<br>within 6 months of SC | Minimum confirmed<br>CD4 within 1 year of SC |
|------|--------------------------------------|------------------------------------------------|----------------------------------------------|
| N    | 2825                                 | 894                                            | 2641                                         |
| 1%   | 55                                   | 55                                             | 40                                           |
| 5%   | 192                                  | 200                                            | 189                                          |
| 10%  | 267                                  | 270                                            | 265                                          |
| 25%  | 393                                  | 400                                            | 400                                          |
| 50%  | 559                                  | 576                                            | 561                                          |
| 75%  | 760                                  | 778                                            | 760                                          |
| 90%  | 1000                                 | 991                                            | 995                                          |
| 100% | 2562                                 | 2611                                           | 2562                                         |

Abbreviations : SC – seroconversion; MSM – sex between men; MSW – heterosexual contact; IDU – injection drug users.
